# Supplementary material for: Genetically predicted testosterone and cancers risk in men: a two-sample Mendelian randomization study
Source: J Transl Med. 2022 Dec 8;20:573. doi: 10.1186/s12967-022-03783-z (PMC9730605; doi:10.1186/s12967-022-03783-z)
Supplement: Supplementary file 1 — Additional file 1: Table S1. Summary of data source of different Traits; Table S2. The single nucleotide polymorphism selected for total testosterone to perform Mendelian randomization analysis; Table S3. The single nucleotide polymorphism selected for available testosterone to perform Mendelian randomization analysis; Table S4. Estimates of causal effect of total testosterone on different types of cancer; Table S5. Estimates of causal effect of bioavailable testosterone on different types of cancer; Table S6. Heterogeneity analysis of mendelian randomization analysis of testosterone on different types of cancer; Table S7. Pleiotropy analysis of mendelian randomization analysis of testosterone on different types of cancer; Table S8. Leave-one-out analysis of mendelian randomization analysis of total testosterone on different types of cancer; Table S9. Leave-one-out analysis of mendelian randomization analysis of bioavailable testosterone on different types of cancer. [file 12967_2022_3783_MOESM1_ESM.xlsx]

## Sheet: Datasheet
SUPPLEMENTARY TABLES
Table S1: Summary of data source of different Traits
Table S2: The single nucleotide polymorphism selected for total testosterone to perform Mendelian randomization analysis.
Table S3: The single nucleotide polymorphism selected for available testosterone to perform Mendelian randomization analysis.
Table S4: Estimates of causal effect of total testosterone on different types of cancer
Table S5: Estimates of causal effect of bioavailable testosterone on different types of cancer
Table S6: Heterogeneity analysis of mendelian randomization analysis of testosterone on different types of cancer
Table S7: Pleiotropy analysis of mendelian randomization analysis of testosterone on different types of cancer
Table S8: Leave-one-out analysis of mendelian randomization analysis of total testosterone on different types of cancer
Table S9: Leave-one-out analysis of mendelian randomization analysis of bioavailable testosterone on different types of cancer

## Sheet: TableS1
Table S1: Summary of data source of different Traits
Traits	Consortium	Number of cases	Number of controls	Number of SNPs	Population	Year	Sexes
Total Testosterone	UK Biobank	-	199569	12321875	European	2020	Males
Bioavailable Testosterone	UK Biobank	-	184205	12321875	European	2020	Males
Head and neck cancer	UK Biobank	1106	372016	9655080	European	2021	Males and Females
Brain cancer	-	606	372016	8629116	European	2021	Males and Females
Thyroid cancer	FinnGen consortium (www.finbb.fi)	989	174006	16380466	European	2021	Males and Females
Non-small cell lung cancer	FinnGen consortium (www.finbb.fi)	1627	174006	16380305	European	2021	Males and Females
Squamous cell lung cancer	FinnGen consortium (www.finbb.fi)	365	174004	16380303	European	2021	Males and Females
Adenocarcinoma cell lung cancer	FinnGen consortium (www.finbb.fi)	571	174005	16380303	European	2021	Males and Females
Lip, oral cavity and pharynx cancer	FinnGen consortium (www.finbb.fi)	126	174006	16380304	European	2021	Males and Females
Oesophageal cancer	FinnGen consortium (www.finbb.fi)	232	174006	16380304	European	2021	Males and Females
Stomach cancer	FinnGen consortium (www.finbb.fi)	633	174006	16,380,305	European	2021	Males and Females
Small intestine cancer	Neale Lab	156	337003	10894596	European	2017	Males and Females
Colorectal cancer	FinnGen consortium (www.finbb.fi)	3022	174006	16380321	European	2021	Males and Females
Colon cancer	MRC-IEU	1494	461439	9851867	European	2018	Males and Females
Rectum cancer	MRC-IEU	1470	461540	9851867	European	2018	Males and Females
Pancreatic cancer	PanScan1	1896	1939	521863	European	2009	Males and Females
Liver and intrahepatic bile ducts cancer	FinnGen consortium (www.finbb.fi)	304	174006	16380303	European	2021	Males and Females
Kidney cancer	FinnGen consortium (www.finbb.fi)	971	174977	16380308	European	2021	Males and Females
Testis cancer	FinnGen consortium (www.finbb.fi)	199	74685	16377430	European	2021	Males and Females
Bladder cancer	FinnGen consortium (www.finbb.fi)	1279	372016	9904926	European	2021	Males and Females
Prostate cancer	PRACTICAL	79148	61106	20,346,368	European	2021	Males
Malignant melanoma	MRC-IEU	3598	462933	9851867	European	2018	Males and Females
malignant neoplasm of male genital organs	FinnGen consortium (www.finbb.fi)	6542	74685	16377994	European	2018	Males and Females
Multiple myeloma and malignant plasma cell neoplasms (all cancers excluded)	FinnGen consortium (www.finbb.fi)	598	180756	16380345	European	2018	Males and Females

## Sheet: TableS2
Table S2: The single nucleotide polymorphism selected for total testosterone to perform Mendelian randomization analysis.
SNP	chr	pos	beta of exposure	standard error of exposure	P value of exposure	effect allele of exposure	other allele of exposure	effect allele frequency of exposure
rs36086195	1	16510894	0.0215167	0.003128	6e-12	T	C	0.577377
rs55737039	1	66143561	0.0232874	0.003891	2.2e-09	G	A	0.196505
rs6676846	1	92942352	0.0293132	0.003845	2.5e-14	A	G	0.795692
rs35002667	1	163256612	0.0234371	0.004098	1.1e-08	A	T	0.17547
rs10779612	1	214318000	-0.0220699	0.003627	1.2e-09	A	G	0.758408
rs9426823	1	154568665	0.0197641	0.003368	4.4e-09	G	A	0.698313
rs79598313	1	27284913	-0.14434	0.010298	1.2e-44	T	C	0.023113
rs3768321	1	40035928	-0.0311249	0.003905	1.6e-15	T	G	0.196418
rs9970140	1	61684288	0.0431746	0.005881	2.1e-13	G	A	0.075272
rs1730865	1	107605611	-0.0336587	0.003275	8.9e-25	T	G	0.656323
rs6736913	2	42510018	-0.0621693	0.010817	9.1e-09	G	A	0.979191
rs10192634	2	180500950	0.0233516	0.003501	2.6e-11	T	C	0.267844
rs2013030	2	234621040	-0.0458038	0.005559	1.7e-16	G	A	0.0847
rs57586626	2	70414485	-0.0433248	0.00625	4.2e-12	C	T	0.065375
rs2290867	2	57952870	-0.0185208	0.003212	8.1e-09	C	A	0.626764
rs34532102	2	64905182	0.0300711	0.003848	5.5e-15	T	C	0.205697
rs1260326	2	27730940	0.0608871	0.003158	7.6e-83	C	T	0.60332
rs13029936	2	208465544	0.0236447	0.003999	3.4e-09	T	C	0.182678
rs645040	3	135926622	-0.0416185	0.003689	1.6e-29	T	G	0.772451
rs34040779	3	107235109	-0.0341059	0.005996	1.3e-08	C	T	0.076092
rs2293252	3	138123854	0.0254495	0.003271	7.2e-15	T	C	0.658603
rs6792725	3	24520283	0.0195875	0.003459	1.5e-08	G	A	0.693399
rs55869022	3	61656512	-0.0281685	0.004639	1.3e-09	G	C	0.131717
rs79223973	3	151992162	0.0331777	0.005151	1.2e-10	C	A	0.101679
rs59194935*	3	172147239	0.0199212	0.003135	2.1e-10	A	G	0.432604
rs7697073	4	77132634	-0.018622	0.003276	1.3e-08	T	C	0.336475
rs10017466	4	100055800	-0.0279527	0.003365	9.8e-17	T	C	0.69646
rs223373	4	103759002	0.0222279	0.003747	3e-09	C	G	0.217725
rs13103534	4	148976981	-0.0173398	0.003169	4.5e-08	G	A	0.600402
rs13108218	4	3443931	-0.0371803	0.003208	4.6e-31	G	A	0.614787
rs11735092	4	88226231	-0.0368285	0.003126	4.9e-32	C	T	0.436371
rs17289915	4	104491078	-0.140284	0.014004	1.3e-23	G	C	0.012355
rs7696472	4	69538180	0.038471	0.0031	2.3e-35	A	G	0.475611
rs184485758	4	819789	-0.0332906	0.00588	1.5e-08	A	C	0.075373
rs7679843	4	22028079	0.0403912	0.005424	9.5e-14	G	C	0.094902
rs329122	5	133864599	-0.0193751	0.003143	7.1e-10	A	G	0.419661
rs112530420	5	95871370	0.0261168	0.004208	5.4e-10	C	T	0.165482
rs40270	5	55804552	-0.0230442	0.003684	4e-10	C	A	0.771281
rs1979835	5	135689839	-0.0315697	0.004516	2.7e-12	A	G	0.136334
rs1349359	5	165901446	0.0179934	0.003135	9.5e-09	A	G	0.436476
rs80138475	5	53304991	-0.0301926	0.004908	7.7e-10	T	C	0.112799
rs6870458	5	137818916	0.0216406	0.003109	3.4e-12	T	G	0.54791
rs1131114	6	31235869	-0.0203583	0.003503	6.2e-09	C	T	0.266265
rs6939861	6	41703041	-0.0235248	0.003566	4.2e-11	A	G	0.261629
rs520829*	6	160767905	0.0204455	0.003107	4.7e-11	G	T	0.475831
rs3130293	6	32177263	-0.0249479	0.003373	1.4e-13	A	G	0.699943
rs476180	6	49329838	-0.0186691	0.003251	9.3e-09	A	G	0.644046
rs9495551	6	100236326	-0.025757	0.003741	5.8e-12	T	C	0.219571
rs1933801*	6	105365725	0.035832	0.003311	2.7e-27	T	C	0.678554
rs2144026	6	152362334	-0.0197479	0.003468	1.2e-08	A	G	0.275092
rs2608911	6	131929751	-0.0278038	0.003949	1.9e-12	G	T	0.189857
rs9379802	6	25933898	0.0198	0.003156	3.5e-10	A	T	0.402414
rs10279715	7	40870935	-0.0189982	0.003117	1.1e-09	G	A	0.462602
rs114949263	7	150498245	0.0294434	0.004935	2.4e-09	C	T	0.111544
rs1513272	7	28200097	0.0194735	0.003097	3.2e-10	T	C	0.501435
rs9986829	7	15019259	0.042141	0.00311	7.7e-42	A	G	0.507335
rs7015	7	97920623	0.0558212	0.003982	1.2e-44	G	A	0.814734
rs4925809*	8	145686313	0.0204283	0.003102	4.5e-11	T	C	0.468258
rs6984305	8	9178268	0.0293821	0.004887	1.8e-09	T	A	0.886353
rs71529289	8	77879487	-0.0329028	0.003534	1.3e-20	T	C	0.252846
rs7835492	8	21089517	0.0251242	0.004375	9.3e-09	C	T	0.147817
rs7844586	8	61782304	0.0204269	0.003603	1.4e-08	C	T	0.751688
rs34955534	8	81710349	-0.0404455	0.005338	3.5e-14	A	G	0.098812
rs10868080	9	86626769	-0.0355409	0.003539	1e-23	A	T	0.743534
rs2090409	9	108967088	-0.0269784	0.003344	7.1e-16	A	C	0.315804
rs10982192	9	117149417	0.0241026	0.003746	1.2e-10	T	C	0.222039
rs1570203	9	4120648	-0.0177417	0.003128	1.4e-08	A	G	0.527118
rs35233014	9	137268177	-0.0230035	0.003578	1.3e-10	A	C	0.744787
rs79717793*	10	5262267	-0.049049	0.00429	2.9e-30	A	G	0.15367
rs3802650	10	93577624	-0.0182724	0.003096	3.6e-09	G	A	0.478318
rs118049783	10	64570933	-0.0551118	0.010072	4.4e-08	G	C	0.024823
rs2393969	10	65140440	0.109136	0.003099	1e-200	C	A	0.47116
rs35988619	10	64193914	0.0347383	0.006331	4.1e-08	C	T	0.069398
rs1408579	10	101912194	0.0189749	0.003083	7.5e-10	T	C	0.49698
rs7915430	10	121660465	-0.0252094	0.003851	5.9e-11	G	T	0.202615
rs3842763*	11	2179204	0.0226021	0.003669	7.3e-10	T	G	0.241222
rs1994721	11	29204531	-0.05035	0.00436	7.5e-31	A	G	0.148723
rs10750766	11	65473798	-0.0227224	0.003416	2.9e-11	A	C	0.71013
rs7945917	11	69285786	-0.0246918	0.003144	4e-15	G	A	0.585119
rs10832570	11	16249510	-0.0248809	0.003175	4.6e-15	G	A	0.389117
rs11039847	11	48596547	0.0228287	0.003627	3.1e-10	C	G	0.760577
rs12796488	11	94131557	-0.0404176	0.004054	2.1e-23	A	C	0.176715
rs4757142	11	13325695	-0.0182726	0.003193	1e-08	A	G	0.60815
rs558944	11	28796001	-0.0202401	0.003119	8.6e-11	C	G	0.562131
rs10892924	11	122773715	0.0318587	0.003147	4.4e-24	T	A	0.567487
rs7123283	11	122809055	-0.0183549	0.003118	3.9e-09	T	C	0.475191
rs7314285	12	111522026	0.0419894	0.006122	7e-12	G	T	0.06878
rs540730	12	57807114	-0.031527	0.003601	2e-18	C	T	0.756605
rs35728231	12	21058489	0.0256728	0.004201	9.9e-10	G	A	0.163354
rs3809272	12	111800258	-0.0186412	0.003372	3.2e-08	A	G	0.302272
rs2393775	12	121424574	0.0273074	0.003194	1.2e-17	A	G	0.620689
rs56196860	12	2908330	0.30074	0.008887	1e-200	A	C	0.03131
rs117664177	12	101036562	-0.0869073	0.014278	1.2e-09	T	C	0.012417
rs10846658	12	124826036	-0.0199426	0.003442	6.9e-09	A	C	0.284962
rs4149056	12	21331549	-0.053511	0.004308	2e-35	C	T	0.151475
rs12320328	12	25408464	-0.045272	0.005586	5.3e-16	G	A	0.084406
rs10878334	12	66211006	-0.0343752	0.005173	3e-11	G	C	0.099714
rs4522206	12	130948847	-0.0193845	0.003264	2.9e-09	C	G	0.352888
rs12429920	13	112720354	0.0201288	0.003106	9.1e-11	A	G	0.472792
rs7338818	13	100568618	-0.0186167	0.003119	2.4e-09	T	C	0.551864
rs12717441	14	23721960	0.0282131	0.003922	6.3e-13	G	C	0.192767
rs72721770	14	74204686	-0.0190917	0.003263	4.9e-09	C	G	0.34522
rs55869502	14	100825670	-0.0200108	0.003105	1.2e-10	T	C	0.495634
rs28929474*	14	94844947	0.213781	0.011176	1.5e-81	T	C	0.019619
rs10484012	14	90002230	-0.0201769	0.003445	4.7e-09	C	T	0.281631
rs17580	14	94847262	0.0511024	0.00727	2.1e-12	A	T	0.047712
rs11621792	14	24871926	-0.0174571	0.003128	2.4e-08	T	C	0.453567
rs72683923	14	50735947	0.069948	0.011263	5.3e-10	C	T	0.019342
rs2239222	14	73011885	0.0200719	0.003271	8.5e-10	G	A	0.350306
rs7166920	15	96219503	-0.0190646	0.003122	1e-09	G	A	0.499477
rs62011286	15	63791125	-0.0279982	0.003264	9.7e-18	A	G	0.342824
rs56332871	15	96714816	0.0487614	0.003486	1.8e-44	A	C	0.27448
rs79391862	15	53739426	-0.160095	0.013595	5.2e-32	C	A	0.013638
rs55707100*	15	43820717	-0.109276	0.00975	3.7e-29	T	C	0.025872
rs55872725	16	53809123	-0.0225151	0.003153	9.3e-13	T	C	0.405996
rs40831*	16	28508447	-0.0341851	0.003139	1.3e-27	G	A	0.429215
rs4843753	16	88003323	-0.0248908	0.00311	1.2e-15	G	A	0.494446
rs8059151	16	4671729	0.0251301	0.003992	3.1e-10	G	T	0.814692
rs4782568	16	83980529	0.0252566	0.00313	7.1e-16	G	C	0.450218
rs8057818	16	1755416	0.032826	0.005931	3.1e-08	A	G	0.074137
rs74618501	17	7301488	0.0440022	0.003155	3.4e-44	T	C	0.402253
rs117372143	17	7492388	-0.138631	0.005994	2.39883e-118	A	G	0.07149
rs222855	17	7110465	-0.0221964	0.003485	1.9e-10	C	A	0.264282
rs12450799	17	17730201	0.0180774	0.003189	1.4e-08	C	T	0.623523
rs2269856	17	29482701	0.0296379	0.003383	1.9e-18	T	C	0.706802
rs2306216	17	73240559	-0.0270106	0.004126	5.9e-11	G	A	0.831108
rs12946520	17	7336371	0.124225	0.003223	1e-200	T	G	0.64016
rs28394864	17	47450775	-0.0520544	0.003111	7.5e-63	A	G	0.459061
rs2668776	18	44750365	-0.0234237	0.003113	5.3e-14	T	C	0.531293
rs35824797	19	19456264	-0.0438149	0.005775	3.3e-14	T	C	0.078284
rs1736177	19	2791624	0.0309257	0.003404	1e-19	T	C	0.293519
rs34851490	19	46384554	0.0489878	0.004857	6.3e-24	G	A	0.11613
rs202200760	19	17346854	0.115689	0.008742	5.6e-40	C	G	0.038814
rs8107967*	19	7972615	0.0206551	0.003121	3.6e-11	G	A	0.565602
rs111981233	19	50016479	0.0511461	0.005714	3.5e-19	G	T	0.079257
rs149131600	19	35549122	0.0344342	0.004095	4.1e-17	T	C	0.173382
rs6077461	20	8940587	-0.0171334	0.003129	4.4e-08	G	A	0.44199
rs6073431	20	43040569	0.0307286	0.003162	2.5e-22	T	C	0.531837
rs6029632	20	39960342	0.0208978	0.003166	4.1e-11	A	G	0.398528
rs575146	22	24295074	-0.018188	0.003302	3.6e-08	A	G	0.600902
rs738409	22	44324727	0.0498588	0.003754	3e-40	G	C	0.216745
rs11703376	22	49678713	0.0341451	0.003506	2e-22	T	C	0.27023
rs5752773	22	29105415	-0.0227863	0.0033	5e-12	C	G	0.674301
*After identifying all SNPs in PhenoScanner database(http://www.phenoscanner.medschl.cam.ac.uk/), we identified 11 of the 143 SNPs as cofounders,which may influence the relationship between total testosterone and cancers.(rs1730865 was associated with body mass index, rs4925809 was associated with Years of educational attainment, rs40831 was associated with alcohol intake frequency, rs3842763, rs…

## Sheet: TableS3
Table S3: The single nucleotide polymorphism selected for bioavailable testosterone to perform Mendelian randomization analysis.
SNP	chr	pos	beta of exposure	standard error of exposure	P value of exposure	effect allele of exposure	other allele of exposure	effect allele frequency of exposure
rs4655598	1	65932185	-0.0257	0.00327	3.9e-15	A	T	0.551739
rs6718154	2	180497923	0.035491	0.003653	2.6e-22	T	C	0.273645
rs12470971	2	11725241	0.032754	0.003436	1.5e-21	A	G	0.338126
rs144956283	2	105867819	0.022245	0.003306	1.7e-11	T	A	0.493513
rs3732218	2	234627304	-0.04533	0.005924	2e-14	A	G	0.08243
rs9824196	3	28807441	0.024967	0.003629	6e-12	T	G	0.720987
rs6766859	3	138055136	0.026174	0.003384	1e-14	T	C	0.627527
rs13072540	3	151994174	-0.02138	0.003281	7.2e-11	C	A	0.452646
rs714786	3	53789022	-0.02285	0.003367	1.1e-11	A	G	0.371338
rs9284814*	3	88273071	-0.03495	0.005124	9e-12	A	G	0.885784
rs7649178	3	61659697	-0.03359	0.004874	5.5e-12	A	G	0.130259
rs34040779	3	107235109	-0.03752	0.006298	2.6e-09	C	T	0.076195
rs34265755	4	169077554	0.018166	0.003274	2.9e-08	G	T	0.54208
rs7693957	4	69971796	-0.01777	0.003258	4.9e-08	A	T	0.456872
rs13148682	4	104755663	-0.03435	0.005355	1.4e-10	G	C	0.101331
rs7679843	4	22028079	0.046641	0.005695	2.6e-16	G	C	0.095191
rs112217694	4	104641064	-0.0523	0.007028	9.9e-14	C	G	0.057605
rs115260227	4	104774698	-0.22846	0.015692	5.1e-48	G	A	0.011861
rs950716	5	135680540	-0.03509	0.004743	1.4e-13	G	A	0.136371
rs2961853	5	165932048	0.018197	0.003263	2.5e-08	C	T	0.466845
rs9376454	6	100242931	-0.02884	0.003918	1.8e-13	T	C	0.220549
rs6459544	6	17414692	-0.02013	0.003533	1.2e-08	G	A	0.314267
rs1264327*	6	30850582	0.035125	0.003431	1.4e-24	A	G	0.340937
rs12524918	6	52736180	0.018447	0.003298	2.2e-08	C	T	0.427365
rs1933801*	6	105365725	0.045556	0.003476	3.1e-39	T	C	0.678411
rs1361109*	6	126771143	0.020528	0.003263	3.2e-10	T	C	0.454459
rs9986829	7	15019259	0.055734	0.003267	2.9e-65	A	G	0.507468
rs10279715	7	40870935	-0.02166	0.003274	3.7e-11	G	A	0.462621
rs145359938	7	78504431	-0.07873	0.011385	4.7e-12	C	G	0.024275
rs62465144*	7	72883106	-0.02317	0.004098	1.6e-08	C	T	0.196752
rs4872310	8	25247181	-0.02317	0.00377	8e-10	A	G	0.24688
rs71529289	8	77879487	-0.03613	0.003713	2.2e-22	T	C	0.25278
rs2631864	8	21112084	0.034968	0.005333	5.5e-11	G	A	0.104868
rs4392940	8	61699931	0.033231	0.003795	2e-18	A	G	0.757273
rs2090409	9	108967088	-0.0302	0.003511	8e-18	A	C	0.316085
rs10867084	9	140774721	0.020065	0.003254	7e-10	C	T	0.488368
rs10982156	9	117088064	0.046571	0.00666	2.7e-12	A	T	0.069578
rs10959646	9	11235729	-0.02474	0.003616	7.8e-12	A	G	0.281879
rs10738700	9	24973797	-0.01919	0.003301	6.1e-09	G	A	0.429493
rs17613014	9	77224424	0.04254	0.003429	2.4e-35	C	T	0.343609
rs28613899	10	101723615	-0.01987	0.00329	1.5e-09	C	G	0.434576
rs7912521	10	67262089	0.060962	0.003293	1.7e-76	C	T	0.417292
rs11191415	10	104602575	-0.02339	0.003581	6.5e-11	T	G	0.289502
rs2035837	11	29200527	-0.07471	0.004582	9.4e-60	C	T	0.148382
rs11600831*	11	72360220	-0.02525	0.004436	1.2e-08	T	C	0.161256
rs647737	11	125083116	-0.02581	0.003675	2.2e-12	T	C	0.735251
rs12796488	11	94131557	-0.05743	0.004258	1.9e-41	A	C	0.176783
rs146115416	11	29378978	-0.09152	0.012129	4.5e-14	T	C	0.018485
rs56196860	12	2908330	0.319654	0.009341	1e-200	A	C	0.031319
rs6486542	12	130952209	-0.02436	0.00331	1.8e-13	T	C	0.429913
rs61932784	12	114132310	-0.02211	0.003967	2.5e-08	A	C	0.217008
rs7337958	13	112742537	-0.04456	0.005635	2.6e-15	G	A	0.095085
rs7338818	13	100568618	-0.02143	0.003274	5.9e-11	T	C	0.551759
rs146454382	14	35803602	0.063143	0.011375	2.8e-08	A	G	0.021723
rs1812755	14	90007637	-0.03559	0.004118	5.5e-18	C	T	0.200801
rs1272131*	14	60886150	0.029166	0.003368	4.8e-18	C	T	0.388999
rs2733341	15	57466232	0.024094	0.003276	1.9e-13	A	T	0.55431
rs17190166	15	89056502	0.018392	0.003298	2.5e-08	A	C	0.424465
rs17703883	15	51530097	0.045711	0.003739	2.3e-34	C	T	0.255615
rs35251956	16	89654800	0.02214	0.003785	4.9e-09	T	C	0.260062
rs2764772	16	20060653	0.033973	0.003456	8.4e-23	A	T	0.333289
rs8061590*	16	28895130	-0.02826	0.003323	1.8e-17	G	A	0.400168
rs328365	16	73864662	0.020019	0.003305	1.4e-09	A	G	0.422355
rs58879558*	17	44095467	0.021702	0.003858	1.9e-08	C	T	0.230112
rs858518	17	7533025	-0.03216	0.003301	2e-22	A	G	0.573415
rs7207165	17	75610240	-0.02656	0.003678	5.2e-13	C	T	0.714088
rs2668776	18	44750365	-0.03022	0.003269	2.4e-20	T	C	0.531022
rs3752214	19	49520612	0.020168	0.003289	8.7e-10	A	G	0.568354
rs2547241	19	48381365	0.021724	0.003281	3.6e-11	G	A	0.457961
rs2295094*	20	33447915	-0.03084	0.004318	9.2e-13	A	G	0.172461
rs11703376	22	49678713	0.041568	0.003681	1.4e-29	T	C	0.270183
*After identifying all SNPs in PhenoScanner database(http://www.phenoscanner.medschl.cam.ac.uk/), we identified 10 of the 71 SNPs as cofounders,which may influence the relationship between bioavailable testosterone and cancers.(rs9284814, rs1264327, rs1933801, rs1361109, rs62465144, rs11600831, rs1272131, rs2295094 were associated with body mass index, rs8061590 was associated with Years of educa…

## Sheet: Table S4
Table S4: Estimates of causal effect of total testosterone on different types of cancer
Exposure	nsnp	Beta	OR (95% CI)	P-value	MR presso
Head and neck cancer	129	-0.00034	0.9997(0.9989,1.0004	0.349	0.609
Brain cancer	124	0.000169	1.0001(0.9996,1.0007)	0.5364	0.969
Thyroid cancer	126	-0.08	0.93(0.70,1.23)	0.5963	0.219
Oesophageal cancer	126	-0.14	0.86(0.50,1.48)	0.5918	0.783
Lip,oral,pharynx cancer	126	0.64	1.90(0.92,3.93)	0.085	0.611
Stomach cancer	126	-0.41	0.66(0.48,0.93)	0.0155	0.954
Liver and intrahepatic bile ducts cancer	126	0.31	1.37(0.81,2.29)	0.2415	0.083
Pancreatic cancer	55	-0.53	0.59(0.36,0.96)	0.0346	0.197
Small intestine cancer	124	0.000387	1.0004(1.0001,1.0007)	0.0116	0.968
Colon cancer	74	-0.000258	0.9997(0.9987,1.0007)	0.6129	0.019
Colorectal cancer	126	-0.07	0.94(0.78,1.126)	0.4826	0.006
Rectum cancer	74	0.000277	1.0003(0.9993,1.0013)	0.5937	0.024
Non-small cell lung cancer	126	-0.17	0.84(0.69,1.04)	0.1136	0.452
Adenocarcinoma cell lung cancer	126	-0.34	0.71(0.49,1.03)	0.0679	0.167
Squamous cell lung cancer	126	-0.26	0.77(0.50,1.19)	0.2427	0.506
Bladder cancer	129	-0.000431	0.9996(0.9988,1.0003)	0.2679	0.77
Prostate cancer	129	0.00941	1.0095(0.9259,1.1006	0.8309	<0.001
Kidney cancer	126	0.15	1.17(0.89,1.53)	0.269	0.426
Testis cancer	126	0.46	1.58(0.79,3.15)	0.1962	<0.001
Malignant melanoma	103	-0.000714	0.9993(0.9979,1.0007)	0.3202	0.007
Malignant neoplasm of male genital organs	126	0.09	1.10(0.96,1.26)	0.1763	0.004
Multiple myeloma and malignant plasma cell neoplasms	126	0.04	1.04(0.74,1.46)	0.8401	0.401

## Sheet: Table S5
Table S5: Estimates of causal effect of bioavailable testosterone on different types of cancer
Exposure	nsnp	Beta	OR (95% CI)	P-value	MR presso
Head and neck cancer	56	0.000806	1.0008(0.9998,1.0018）	0.1268	0.959
Brain cancer	54	-0.000149	0.9999(0.9989,1.0007)	0.7364	0.147
Thyroid cancer	55	0.21	1.24(0.78,1.96)	0.3569	0.206
Oesophageal cancer	55	0.11	1.12(0.46,2.72)	0.8085	0.443
Lip,oral,pharynx cancer	55	1.21	3.34(0.98,11.42)	0.0543	0.307
Stomach cancer	55	0.1	1.11(0.65,1.87)	0.7074	0.595
Liver and intrahepatic bile ducts cancer	55	0.23	1.26(0.59,2.67)	0.5494	0.594
Pancreatic cancer	25	-0.41	0.66(0.34,1.31)	0.2364	0.716
Small intestine cancer	54	0.00041	1.0004(1.0000,1.0008)	0.0659	0.893
Colon cancer	36	-0.000296	0.9997(0.9983,1.0011)	0.6821	0.262
Colorectal cancer	55	-0.15	0.86(0.66,1.12)	0.255	0.11
Rectum cancer	36	0.00103	1.0010(0.9993,1.0027)	0.2293	0.031
Non-small cell lung cancer	55	-0.22	0.80(0.57,1.13)	0.207	0.296
Adenocarcinoma cell lung cancer	55	0.12	1.12(0.64,1.96)	0.6819	0.897
Squamous cell lung cancer	55	-0.55	0.58(0.28,1.19)	0.1373	0.421
Bladder cancer	56	-0.00115	0.9989(0.9976,1.0001)	0.0797	0.1
Prostate cancer	52	0.16	1.17(1.09,1.26)	2.51E-05*	0.908
Kidney cancer	55	0.07	1.07(0.65,1.75)	0.7857	0.07
Testis cancer	55	0.31	1.36(0.54,3.44)	0.5154	0.705
Malignant melanoma	45	0.0016	1.0016(0.9989,1.0042)	0.2415	0.001
Malignant neoplasm of male genital organs	55	0.19	1.20(0.97,1.49)	0.0904	0.067
Multiple myeloma and malignant plasma cell neoplasms	55	0.06	1.06(0.62,1.82)	0.83	0.559
*p-value after removing rs10279715, rs11191415, rs13072540, and rs34040779

## Sheet: Table S6
Table S6: Heterogeneity analysis of mendelian randomization analysis of testosterone on different types of cancer
Exposure	Outcome	Method	Q	Q_df	Q_pval
Stomach cancer	Total testosterone	MR Egger	100.343	124	0.941442
Stomach cancer	Total testosterone	Inverse variance weighted	100.475	125	0.947713
Prostate cancer	Total testosterone	MR Egger	64.6601	53	0.130838
Prostate cancer	Total testosterone	Inverse variance weighted	65.7382	54	0.131396
Small intestine cancer	Total testosterone	MR Egger	92.7289	122	0.97754
Small intestine cancer	Total testosterone	Inverse variance weighted	96.7032	123	0.961663
Prostate cancer	Bioavailable testosterone	MR Egger	39.6282	50	0.853394
Prostate cancer	Bioavailable testosterone	Inverse variance weighted	39.6496	51	0.875482

## Sheet: Table S7
Table S7: Pleiotropy analysis of mendelian randomization analysis of testosterone on different types of cancer
Exposure	Outcome	egger_intercept	SE	P-value
Small intestine cancer	Total testosterone	1.97e-05	9.88e-06	0.04843
Stomach cancer	Total testosterone	-0.00401	0.011019	0.716227
Pancreatic cancer	Total testosterone	-0.0153	0.016275	0.351466
Prostate cancer	Bioavailable testosterone	0.000382	0.002615	0.884418

## Sheet: Table S8
Table S8: Leave-one-out analysis of mendelian randomization analysis of total testosterone on different types of cancer
Exposure	Outcome	SNP	Beta	SE	P-value
Total Testosterone	Pancreatic cancer	rs10484012	-0.51338	0.252549	0.042074
Total Testosterone	Pancreatic cancer	rs10832570	-0.4828	0.248388	0.051926
Total Testosterone	Pancreatic cancer	rs11621792	-0.512	0.252101	0.042262
Total Testosterone	Pancreatic cancer	rs11735092	-0.51622	0.256626	0.044266
Total Testosterone	Pancreatic cancer	rs12320328	-0.47157	0.246405	0.055645
Total Testosterone	Pancreatic cancer	rs12450799	-0.53812	0.253238	0.033591
Total Testosterone	Pancreatic cancer	rs1260326	-0.57549	0.262247	0.028203
Total Testosterone	Pancreatic cancer	rs12796488	-0.49335	0.253239	0.051395
Total Testosterone	Pancreatic cancer	rs13029936	-0.50222	0.250116	0.044648
Total Testosterone	Pancreatic cancer	rs13103534	-0.54	0.252896	0.032739
Total Testosterone	Pancreatic cancer	rs1349359	-0.51376	0.252472	0.041857
Total Testosterone	Pancreatic cancer	rs1408579	-0.53598	0.253549	0.034524
Total Testosterone	Pancreatic cancer	rs149131600	-0.52761	0.254756	0.038355
Total Testosterone	Pancreatic cancer	rs1570203	-0.50348	0.250066	0.044075
Total Testosterone	Pancreatic cancer	rs1736177	-0.50718	0.254293	0.046099
Total Testosterone	Pancreatic cancer	rs1979835	-0.53454	0.254247	0.035515
Total Testosterone	Pancreatic cancer	rs2013030	-0.57672	0.249797	0.020957
Total Testosterone	Pancreatic cancer	rs2090409	-0.52108	0.254358	0.040499
Total Testosterone	Pancreatic cancer	rs2239222	-0.53249	0.253867	0.035949
Total Testosterone	Pancreatic cancer	rs2269856	-0.5482	0.253897	0.030838
Total Testosterone	Pancreatic cancer	rs2290867	-0.54254	0.252913	0.031941
Total Testosterone	Pancreatic cancer	rs2306216	-0.53705	0.253751	0.034306
Total Testosterone	Pancreatic cancer	rs2393775	-0.41758	0.228869	0.068069
Total Testosterone	Pancreatic cancer	rs2393969	-0.52959	0.297747	0.075297
Total Testosterone	Pancreatic cancer	rs2608911	-0.57195	0.247659	0.020921
Total Testosterone	Pancreatic cancer	rs3130293	-0.52893	0.254247	0.037493
Total Testosterone	Pancreatic cancer	rs329122	-0.52766	0.253879	0.037673
Total Testosterone	Pancreatic cancer	rs34851490	-0.50494	0.254647	0.04738
Total Testosterone	Pancreatic cancer	rs36086195	-0.50285	0.251477	0.045543
Total Testosterone	Pancreatic cancer	rs3802650	-0.54296	0.252763	0.031705
Total Testosterone	Pancreatic cancer	rs4757142	-0.54872	0.251815	0.029328
Total Testosterone	Pancreatic cancer	rs476180	-0.53876	0.253295	0.033419
Total Testosterone	Pancreatic cancer	rs540730	-0.54579	0.254151	0.031754
Total Testosterone	Pancreatic cancer	rs55737039	-0.54015	0.253345	0.033001
Total Testosterone	Pancreatic cancer	rs55869502	-0.51985	0.253595	0.040374
Total Testosterone	Pancreatic cancer	rs55872725	-0.47947	0.245759	0.051062
Total Testosterone	Pancreatic cancer	rs57586626	-0.52945	0.254311	0.037351
Total Testosterone	Pancreatic cancer	rs6077461	-0.52184	0.25337	0.039437
Total Testosterone	Pancreatic cancer	rs62011286	-0.49875	0.252733	0.048445
Total Testosterone	Pancreatic cancer	rs645040	-0.53464	0.256114	0.036842
Total Testosterone	Pancreatic cancer	rs6676846	-0.54895	0.253369	0.030264
Total Testosterone	Pancreatic cancer	rs6792725	-0.54723	0.252175	0.030005
Total Testosterone	Pancreatic cancer	rs6870458	-0.52062	0.253895	0.040312
Total Testosterone	Pancreatic cancer	rs7015	-0.6306	0.249417	0.011462
Total Testosterone	Pancreatic cancer	rs7123283	-0.50777	0.251514	0.043504
Total Testosterone	Pancreatic cancer	rs71529289	-0.5167	0.255037	0.042768
Total Testosterone	Pancreatic cancer	rs7166920	-0.56517	0.248163	0.022761
Total Testosterone	Pancreatic cancer	rs7314285	-0.57785	0.245517	0.018592
Total Testosterone	Pancreatic cancer	rs7915430	-0.52451	0.253927	0.038867
Total Testosterone	Pancreatic cancer	rs79223973	-0.54457	0.253082	0.031418
Total Testosterone	Pancreatic cancer	rs8057818	-0.55231	0.250054	0.027192
Total Testosterone	Pancreatic cancer	rs8059151	-0.53071	0.253872	0.036575
Total Testosterone	Pancreatic cancer	rs9426823	-0.5233	0.253584	0.039056
Total Testosterone	Pancreatic cancer	rs9495551	-0.5493	0.252761	0.029765
Total Testosterone	Pancreatic cancer	rs9970140	-0.55621	0.251953	0.027272
Total Testosterone	Pancreatic cancer	All	-0.52911	0.250454	0.034636
Total Testosterone	Small intestine cancer	rs10017466	0.000379	0.000154	0.01382
Total Testosterone	Small intestine cancer	rs10192634	0.000381	0.000154	0.013172
Total Testosterone	Small intestine cancer	rs10279715	0.000387	0.000154	0.011775
Total Testosterone	Small intestine cancer	rs10484012	0.000381	0.000154	0.013015
Total Testosterone	Small intestine cancer	rs10750766	0.000392	0.000154	0.010766
Total Testosterone	Small intestine cancer	rs10779612	0.000386	0.000154	0.011932
Total Testosterone	Small intestine cancer	rs10832570	0.000397	0.000154	0.009905
Total Testosterone	Small intestine cancer	rs10846658	0.00038	0.000154	0.013465
Total Testosterone	Small intestine cancer	rs10868080	0.000391	0.000154	0.011038
Total Testosterone	Small intestine cancer	rs10878334	0.000395	0.000154	0.010195
Total Testosterone	Small intestine cancer	rs10982192	0.000398	0.000154	0.00955
Total Testosterone	Small intestine cancer	rs111981233	0.000402	0.000154	0.009035
Total Testosterone	Small intestine cancer	rs114949263	0.000387	0.000154	0.011832
Total Testosterone	Small intestine cancer	rs11621792	0.000371	0.000154	0.015819
Total Testosterone	Small intestine cancer	rs11703376	0.000389	0.000154	0.011586
Total Testosterone	Small intestine cancer	rs11735092	0.000419	0.000154	0.006595
Total Testosterone	Small intestine cancer	rs117372143	0.000379	0.000157	0.015781
Total Testosterone	Small intestine cancer	rs117664177	0.000386	0.000154	0.011925
Total Testosterone	Small intestine cancer	rs118049783	0.000399	0.000154	0.009466
Total Testosterone	Small intestine cancer	rs12320328	0.000383	0.000154	0.012667
Total Testosterone	Small intestine cancer	rs12429920	0.000386	0.000154	0.012044
Total Testosterone	Small intestine cancer	rs12450799	0.00039	0.000154	0.011097
Total Testosterone	Small intestine cancer	rs1260326	0.000363	0.000156	0.019721
Total Testosterone	Small intestine cancer	rs12717441	0.000372	0.000154	0.015404
Total Testosterone	Small intestine cancer	rs12796488	0.000397	0.000154	0.010004
Total Testosterone	Small intestine cancer	rs12946520	0.000422	0.000164	0.009901
Total Testosterone	Small intestine cancer	rs13029936	0.00039	0.000154	0.011097
Total Testosterone	Small intestine cancer	rs13103534	0.000386	0.000154	0.011899
Total Testosterone	Small intestine cancer	rs13108218	0.000372	0.000154	0.015892
Total Testosterone	Small intestine cancer	rs1349359	0.000388	0.000154	0.011457
Total Testosterone	Small intestine cancer	rs1408579	0.000387	0.000154	0.011734
Total Testosterone	Small intestine cancer	rs149131600	0.000387	0.000154	0.011778
Total Testosterone	Small intestine cancer	rs1513272	0.000388	0.000154	0.011508
Total Testosterone	Small intestine cancer	rs1570203	0.000373	0.000154	0.015298
Total Testosterone	Small intestine cancer	rs17289915	0.000384	0.000154	0.012593
Total Testosterone	Small intestine cancer	rs1736177	0.000383	0.000154	0.012901
Total Testosterone	Small intestine cancer	rs17580	0.000377	0.000154	0.014302
Total Testosterone	Small intestine cancer	rs184485758	0.000388	0.000154	0.011582
Total Testosterone	Small intestine cancer	rs1979835	0.000381	0.000154	0.013277
Total Testosterone	Small intestine cancer	rs1994721	0.000394	0.000154	0.010567
Total Testosterone	Small intestine cancer	rs2013030	0.000394	0.000154	0.010488
Total Testosterone	Small intestine cancer	rs2090409	0.000393	0.000154	0.010658
Total Testosterone	Small intestine cancer	rs2144026	0.000388	0.000154	0.011517
Total Testosterone	Small intestine cancer	rs222855	0.000378	0.000154	0.01396
Total Testosterone	Small intestine cancer	rs223373	0.000391	0.000154	0.010874
Total Testosterone	Small intestine cancer	rs2239222	0.000389	0.000154	0.011354
Total Testosterone	Small intestine cancer	rs2269856	0.000387	0.000154	0.011982
Total Testosterone	Small intestine cancer	rs2290867	0.000385	0.000154	0.012094
Total Testosterone	Small intestine cancer	rs2293252	0.000375	0.000154	0.01471
Total Testosterone	Small intestine cancer	rs2306216	0.000397	0.000154	0.009785
Total Testosterone	Small intestine cancer	rs2393775	0.000364	0.000154	0.017943
Total Testosterone	Small intestine cancer	rs2393969	0.000479	0.000162	0.003071
Total Testosterone	Small intestine cancer	rs2608911	0.000381	0.000154	0.013165
Total Testosterone	Small intestine cancer	rs2668776	0.000377	0.000154	0.014234
Total Testosterone	Small intestine cancer	rs28394864	0.000398	0.000155	0.010341
Total Testosterone	Small intestine cancer	rs3130293	0.000363	0.000154	0.018289
Total Testosterone	Small intestine cancer	rs329122	0.000398	0.000154	0.009519
Total Testosterone	Small intestine cancer	rs34040779	0.000379	0.000154	0.013634
Total Testosterone	Small intestine cancer	rs34532102	0.000399	0.000154	0.0095
Total Testosterone	Small intestine cancer	rs34851490	0.000365	0.000154	0.017928
Total Testosterone	Small intestine cancer	rs34955534	0.00039	0.000154	0.011226
Total Testosterone	Small intestine cancer	rs35002667	0.000402	0.000154	0.008906
Total Testosterone	Small intestine cancer	rs35233014	0.000386	0.000154	0.011972
Total Testosterone	Small intestine cancer	rs35728231	0.00037	0.000154	0.015999
Total Testosterone	Small intestine cancer	rs35824797	0.000379	0.000154	0.013795
Total Testosterone	Small intestine cancer	rs35988619	0.000403	0.000154	0.008774
Total Testosterone	Small intestine cancer	rs36086195	0.000383	0.000154	0.012598
Total Testosterone	Small intestine cancer	rs3768321	0.000398	0.000154	0.009582
Total Testosterone	Small intestine cancer	rs3802650	0.00039	0.000154	0.011203
Total Testosterone	Small intestine cancer	rs3809272	0.000392	0.000154	0.010785
Total Testosterone	Small intestine cancer	rs40270	0.000391	0.000154	0.011006
Total Testosterone	Small intestine cancer	rs4149056	0.000375	0.000154	0.015019
Total Testosterone	Small intestine cancer	rs4522206	0.000384	0.000154	0.012439
Total Testosterone	Small intestine cancer	rs4757142	0.000389	0.000154	0.011368
Total Testosterone	Small intestine cancer	rs476180	0.000385	0.000154	0.012272
Total Testosterone	Small intestine cancer	rs4843753	0.000386	0.000154	0.011998
Total Testosterone	Small intestine cancer	rs540730	0.000392	0.000154	0.010925
Total Testosterone	Small intestine cancer	rs55737039	0.000376	0.000154	0.014299
Total Testosterone	Small intestine cancer	rs55869022	0.0004	0.000154	0.009151
Total Testosterone	Small intestine cancer	rs55869502	0.000378	0.000154	0.01385
Total Testosterone	Small intestine cancer	rs55872725	0.000395	0.000154	0.010108
Total Testosterone	Small intestine cancer	rs56196860	0.000391	0.000161	0.015391
Total Testosterone	Small intestine cancer	rs56332871	0.000357	0.000155	0.021016
Total Testosterone	Small intestine cancer	rs575146	0.000381	0.000154	0.013024
Total Testosterone	Small intestine cancer	rs5752773	0.000391	0.000154	0.010965
Total Testosterone	Small intestine cancer	rs57586626	0.000382	0.000154	0.012879
Total Testosterone	Small intestine cancer	rs6029632	0.000378	0.000154	0.013828
Total Testosterone	Small intestine cancer	rs6073431	0.000381	0.000154	0.013249
Total Testosterone	Small intestine cancer	rs6077461	0.000394	0.000154	0.010231
Total Testosterone	Small intestine cancer	rs62011286	0.000398	0.000154	0.009596
Total Testosterone	Small intestine cancer	rs645040	0.000404	0.000154	0.008858
Total Testosterone	Small intestine cancer	rs6676846	0.000376	0.000154	0.014412
Total Testosterone	Small intestine cancer	rs6736913	0.000394	0.000154	0.010387
Total Testosterone	Small intestine cancer	rs6792725	0.000393	0.000154	0.010432
Total Testosterone	Small intestine cancer	rs6870458	0.000383	0.000154	0.012721
Total Testosterone	Small intestine cancer	rs6939861	0.000386	0.000154	0.012089
Total Testosterone	Small intestine cancer	rs6984305	0.000378	0.000154	0.01376
Total Testosterone	Small intestine cancer	rs7015	0.000395	0.000155	0.010627
Total Testosterone	Small intestine cancer	rs7123283	0.000375	0.000154	0.014587
Total Testosterone	Small intestine cancer	rs7166920	0.000379	0.000154	0.013737
Total Testosterone	Small intestine cancer	rs72683923	0.000387	0.000154	0.011862
Total Testosterone	Small intestine cancer	rs72721770	0.00038	0.000154	0.013254
Total Testosterone	Small intestine cancer	rs7314285	0.00039	0.000154	0.01124
Total Testosterone	Small intestine cancer	rs7338818	0.000388	0.000154	0.011515
Total Testosterone	Small intestine cancer	rs738409	0.000392	0.000155	0.011088
Total Testosterone	Small intestine cancer	rs74618501	0.000394	0.000155	0.010922
Total Testosterone	Small intestine cancer	rs7679843	0.000395	0.000154	0.010244
Total Testosterone	Small intestine cancer	rs7696472	0.000397	0.000154	0.010035
Total Testosterone	Small intestine cancer	rs7697073	0.000384	0.000154	0.012304
Total Testosterone	Small intestine cancer	rs7835492	0.000392	0.000154	0.010735
Total Testosterone	Small intestine cancer	rs7844586	0.000377	0.000154	0.014214
Total Testosterone	Small intestine cancer	rs7915430	0.000388	0.000154	0.011568
Total Testosterone	Small intestine cancer	rs79223973	0.000381	0.000154	0.013133
Total Testosterone	Small intestine cancer	rs79391862	0.000376	0.000154	0.0149
Total Testosterone	Small intestine cancer	rs7945917	0.000394	0.000154	0.010372
Total Testosterone	Small intestine cancer	rs79598313	0.000413	0.000155	0.007546
Total Testosterone	Small intestine cancer	rs80138475	0.000387	0.000154	0.011711
Total Testosterone	Small intestine cancer	rs8057818	0.00039	0.000154	0.011063
Total Testosterone	Small intestine cancer	rs8059151	0.000391	0.000154	0.010993
Total Testosterone	Small intestine cancer	rs9379802	0.000393	0.000154	0.010561
Total Testosterone	Small intestine cancer	rs9426823	0.000385	0.000154	0.012278
Total Testosterone	Small intestine cancer	rs9495551	0.000386	0.000154	0.01197
Total Testosterone	Small intestine cancer	rs9970140	0.000395	0.000154	0.010225
Total Testosterone	Small intestine cancer	rs9986829	0.000379	0.000155	0.014318
Total Testosterone	Small intestine cancer	All	0.000388	0.000153	0.01153
Total Testosterone	Stomach cancer	rs10017466	-0.41188	0.169346	0.015009
Total Testosterone	Stomach cancer	rs10192634	-0.40608	0.169189	0.016387
Total Testosterone	Stomach cancer	rs10279715	-0.40992	0.169118	0.015355
Total Testosterone	Stomach cancer	rs10484012	-0.41643	0.16907	0.013776
Total Testosterone	Stomach cancer	rs10750766	-0.4147	0.16915	0.014219
Total Testosterone	Stomach cancer	rs10779612	-0.40747	0.169126	0.015985
Total Testosterone	Stomach cancer	rs10832570	-0.42225	0.169258	0.012605
Total Testosterone	Stomach cancer	rs10846658	-0.39961	0.169102	0.018121
Total Testosterone	Stomach cancer	rs10868080	-0.39034	0.169569	0.021337
Total Testosterone	Stomach cancer	rs10878334	-0.3975	0.169086	0.01873
Total Testosterone	Stomach cancer	rs10982192	-0.40758	0.169224	0.016016
Total Testosterone	Stomach cancer	rs111981233	-0.41012	0.16918	0.015343
Total Testosterone	Stomach cancer	rs1131114	-0.40269	0.169014	0.017191
Total Testosterone	Stomach cancer	rs114949263	-0.41496	0.169035	0.014095
Total Testosterone	Stomach cancer	rs11621792	-0.40612	0.169062	0.016298
Total Testosterone	Stomach cancer	rs11703376	-0.4235	0.169453	0.012447
Total Testosterone	Stomach cancer	rs11735092	-0.42392	0.169767	0.012523
Total Testosterone	Stomach cancer	rs117372143	-0.44293	0.173546	0.010704
Total Testosterone	Stomach cancer	rs117664177	-0.41161	0.168977	0.014855
Total Testosterone	Stomach cancer	rs118049783	-0.40718	0.168883	0.015909
Total Testosterone	Stomach cancer	rs12320328	-0.37447	0.169618	0.027261
Total Testosterone	Stomach cancer	rs12429920	-0.40978	0.169129	0.015398
Total Testosterone	Stomach cancer	rs12450799	-0.40965	0.169091	0.015407
Total Testosterone	Stomach cancer	rs1260326	-0.41844	0.17141	0.014641
Total Testosterone	Stomach cancer	rs12717441	-0.39095	0.169222	0.020873
Total Testosterone	Stomach cancer	rs12796488	-0.40983	0.169469	0.015593
Total Testosterone	Stomach cancer	rs12946520	-0.39977	0.180433	0.02672
Total Testosterone	Stomach cancer	rs13029936	-0.41136	0.16906	0.014964
Total Testosterone	Stomach cancer	rs13103534	-0.3958	0.169065	0.019226
Total Testosterone	Stomach cancer	rs13108218	-0.40599	0.169751	0.016773
Total Testosterone	Stomach cancer	rs1349359	-0.41127	0.169089	0.015005
Total Testosterone	Stomach cancer	rs1408579	-0.41087	0.169105	0.015113
Total Testosterone	Stomach cancer	rs149131600	-0.39001	0.16935	0.02128
Total Testosterone	Stomach cancer	rs1513272	-0.42042	0.169129	0.012927
Total Testosterone	Stomach cancer	rs1570203	-0.4205	0.169068	0.012877
Total Testosterone	Stomach cancer	rs17289915	-0.40766	0.168863	0.015771
Total Testosterone	Stomach cancer	rs1736177	-0.39335	0.169524	0.020324
Total Testosterone	Stomach cancer	rs17580	-0.40745	0.168916	0.015859
Total Testosterone	Stomach cancer	rs184485758	-0.39968	0.169238	0.018194
Total Testosterone	Stomach cancer	rs1979835	-0.41586	0.169129	0.013938
Total Testosterone	Stomach cancer	rs1994721	-0.40829	0.169872	0.016239
Total Testosterone	Stomach cancer	rs2013030	-0.40609	0.169284	0.016446
Total Testosterone	Stomach cancer	rs202200760	-0.45762	0.170909	0.007417
Total Testosterone	Stomach cancer	rs2090409	-0.39002	0.169335	0.021265
Total Testosterone	Stomach cancer	rs2144026	-0.40487	0.16911	0.016661
Total Testosterone	Stomach cancer	rs222855	-0.41128	0.169127	0.015024
Total Testosterone	Stomach cancer	rs223373	-0.41997	0.169138	0.013028
Total Testosterone	Stomach cancer	rs2239222	-0.41156	0.169129	0.014957
Total Testosterone	Stomach cancer	rs2269856	-0.42169	0.169436	0.012818
Total Testosterone	Stomach cancer	rs2290867	-0.41034	0.169086	0.015232
Total Testosterone	Stomach cancer	rs2293252	-0.41769	0.169269	0.013602
Total Testosterone	Stomach cancer	rs2306216	-0.39487	0.169055	0.019504
Total Testosterone	Stomach cancer	rs2393775	-0.39913	0.169384	0.018455
Total Testosterone	Stomach cancer	rs2393969	-0.43716	0.178431	0.014286
Total Testosterone	Stomach cancer	rs2608911	-0.39728	0.16925	0.01891
Total Testosterone	Stomach cancer	rs2668776	-0.42192	0.169246	0.01267
Total Testosterone	Stomach cancer	rs28394864	-0.40986	0.170894	0.016471
Total Testosterone	Stomach cancer	rs3130293	-0.43043	0.169191	0.010959
Total Testosterone	Stomach cancer	rs329122	-0.39738	0.169124	0.018791
Total Testosterone	Stomach cancer	rs34040779	-0.427	0.16909	0.011562
Total Testosterone	Stomach cancer	rs34532102	-0.4159	0.169282	0.014016
Total Testosterone	Stomach cancer	rs34851490	-0.40619	0.169224	0.016381
Total Testosterone	Stomach cancer	rs34955534	-0.42305	0.169313	0.012468
Total Testosterone	Stomach cancer	rs35002667	-0.38614	0.169159	0.022447
Total Testosterone	Stomach cancer	rs35233014	-0.4052	0.169158	0.016603
Total Testosterone	Stomach cancer	rs35728231	-0.41904	0.169034	0.013175
Total Testosterone	Stomach cancer	rs35824797	-0.39546	0.169161	0.019399
Total Testosterone	Stomach cancer	rs35988619	-0.40802	0.169085	0.015816
Total Testosterone	Stomach cancer	rs36086195	-0.41144	0.169152	0.015001
Total Testosterone	Stomach cancer	rs3768321	-0.40661	0.169241	0.016281
Total Testosterone	Stomach cancer	rs3802650	-0.41264	0.16909	0.014673
Total Testosterone	Stomach cancer	rs3809272	-0.41476	0.169082	0.014166
Total Testosterone	Stomach cancer	rs40270	-0.41244	0.169179	0.014773
Total Testosterone	Stomach cancer	rs4149056	-0.40358	0.17021	0.017738
Total Testosterone	Stomach cancer	rs4522206	-0.40589	0.169084	0.016372
Total Testosterone	Stomach cancer	rs4757142	-0.39974	0.169096	0.01808
Total Testosterone	Stomach cancer	rs4843753	-0.4135	0.169257	0.014566
Total Testosterone	Stomach cancer	rs540730	-0.42618	0.16942	0.011886
Total Testosterone	Stomach cancer	rs55737039	-0.41706	0.169218	0.013716
Total Testosterone	Stomach cancer	rs55869022	-0.41175	0.169004	0.014836
Total Testosterone	Stomach cancer	rs55869502	-0.41402	0.169142	0.014374
Total Testosterone	Stomach cancer	rs55872725	-0.40198	0.16922	0.017526
Total Testosterone	Stomach cancer	rs56196860	-0.36502	0.172025	0.033845
Total Testosterone	Stomach cancer	rs56332871	-0.3995	0.170315	0.018994
Total Testosterone	Stomach cancer	rs575146	-0.42545	0.169047	0.011845
Total Testosterone	Stomach cancer	rs5752773	-0.39909	0.169143	0.018302
Total Testosterone	Stomach cancer	rs57586626	-0.39378	0.169352	0.020061
Total Testosterone	Stomach cancer	rs6029632	-0.40724	0.169176	0.016075
Total Testosterone	Stomach cancer	rs6073431	-0.41844	0.169546	0.013586
Total Testosterone	Stomach cancer	rs6077461	-0.40843	0.169067	0.015702
Total Testosterone	Stomach cancer	rs62011286	-0.40652	0.169406	0.016409
Total Testosterone	Stomach cancer	rs645040	-0.40842	0.16951	0.015978
Total Testosterone	Stomach cancer	rs6676846	-0.40916	0.169292	0.015654
Total Testosterone	Stomach cancer	rs6736913	-0.40472	0.16906	0.016669
Total Testosterone	Stomach cancer	rs6792725	-0.4049	0.169126	0.016663
Total Testosterone	Stomach cancer	rs6870458	-0.41895	0.169181	0.013274
Total Testosterone	Stomach cancer	rs6939861	-0.39091	0.169164	0.020843
Total Testosterone	Stomach cancer	rs6984305	-0.40527	0.169145	0.016575
Total Testosterone	Stomach cancer	rs7015	-0.39439	0.170093	0.020412
Total Testosterone	Stomach cancer	rs7123283	-0.40429	0.169098	0.016808
Total Testosterone	Stomach cancer	rs71529289	-0.40205	0.169564	0.017736
Total Testosterone	Stomach cancer	rs7166920	-0.40738	0.16912	0.016005
Total Testosterone	Stomach cancer	rs72683923	-0.40592	0.169011	0.016318
Total Testosterone	Stomach cancer	rs72721770	-0.40738	0.169096	0.015989
Total Testosterone	Stomach cancer	rs7314285	-0.4092	0.169066	0.015504
Total Testosterone	Stomach cancer	rs7338818	-0.40883	0.169099	0.015619
Total Testosterone	Stomach cancer	rs738409	-0.42782	0.170166	0.011933
Total Testosterone	Stomach cancer	rs74618501	-0.4054	0.17015	0.01719
Total Testosterone	Stomach cancer	rs7679843	-0.41319	0.169164	0.014584
Total Testosterone	Stomach cancer	rs7696472	-0.44689	0.169941	0.008547
Total Testosterone	Stomach cancer	rs7697073	-0.39584	0.16908	0.019224
Total Testosterone	Stomach cancer	rs7835492	-0.41255	0.169055	0.014675
Total Testosterone	Stomach cancer	rs7844586	-0.417	0.169026	0.013623
Total Testosterone	Stomach cancer	rs7915430	-0.398	0.169187	0.018652
Total Testosterone	Stomach cancer	rs79223973	-0.40008	0.169038	0.017942
Total Testosterone	Stomach cancer	rs79391862	-0.42429	0.171159	0.013179
Total Testosterone	Stomach cancer	rs7945917	-0.40583	0.169288	0.016517
Total Testosterone	Stomach cancer	rs79598313	-0.4052	0.170919	0.017752
Total Testosterone	Stomach cancer	rs80138475	-0.39143	0.169142	0.020657
Total Testosterone	Stomach cancer	rs8057818	-0.40119	0.169049	0.017633
Total Testosterone	Stomach cancer	rs8059151	-0.39989	0.169116	0.01805
Total Testosterone	Stomach cancer	rs9379802	-0.40929	0.169129	0.01552
Total Testosterone	Stomach cancer	rs9426823	-0.40305	0.169107	0.017155
Total Testosterone	Stomach cancer	rs9495551	-0.40066	0.169242	0.017914
Total Testosterone	Stomach cancer	rs9970140	-0.39077	0.169255	0.020958
Total Testosterone	Stomach cancer	rs9986829	-0.41991	0.170162	0.013598
Total Testosterone	Stomach cancer	All	-0.40861	0.16885	0.015523

## Sheet: Table S9
Table S9: Leave-one-out analysis of mendelian randomization analysis of bioavailable testosterone on different types of cancer
Exposure	Outcome	SNP	Beta	SE	P-value
Bioavailable Testosterone	Prostate cancer	rs10738700	0.153577	0.036952	3.24e-05
Bioavailable Testosterone	Prostate cancer	rs10867084	0.156818	0.036974	2.22e-05
Bioavailable Testosterone	Prostate cancer	rs10959646	0.157318	0.037006	2.13e-05
Bioavailable Testosterone	Prostate cancer	rs10982156	0.160397	0.036958	1.43e-05
Bioavailable Testosterone	Prostate cancer	rs112217694	0.15041	0.037054	4.92e-05
Bioavailable Testosterone	Prostate cancer	rs115260227	0.14307	0.0375	0.000136
Bioavailable Testosterone	Prostate cancer	rs11703376	0.148865	0.037311	6.61e-05
Bioavailable Testosterone	Prostate cancer	rs12470971	0.15717	0.037167	2.35e-05
Bioavailable Testosterone	Prostate cancer	rs12524918	0.156777	0.036951	2.21e-05
Bioavailable Testosterone	Prostate cancer	rs12796488	0.15094	0.037498	5.69e-05
Bioavailable Testosterone	Prostate cancer	rs13148682	0.154653	0.036977	2.88e-05
Bioavailable Testosterone	Prostate cancer	rs145359938	0.159993	0.036931	1.48e-05
Bioavailable Testosterone	Prostate cancer	rs146115416	0.156893	0.037043	2.28e-05
Bioavailable Testosterone	Prostate cancer	rs146454382	0.155144	0.036965	2.7e-05
Bioavailable Testosterone	Prostate cancer	rs17190166	0.157383	0.036953	2.05e-05
Bioavailable Testosterone	Prostate cancer	rs17613014	0.152189	0.037435	4.8e-05
Bioavailable Testosterone	Prostate cancer	rs17703883	0.154139	0.037442	3.84e-05
Bioavailable Testosterone	Prostate cancer	rs1812755	0.161396	0.037074	1.34e-05
Bioavailable Testosterone	Prostate cancer	rs2035837	0.152339	0.037987	6.07e-05
Bioavailable Testosterone	Prostate cancer	rs2090409	0.157063	0.037151	2.36e-05
Bioavailable Testosterone	Prostate cancer	rs2547241	0.156528	0.037005	2.34e-05
Bioavailable Testosterone	Prostate cancer	rs2631864	0.15011	0.037003	4.98e-05
Bioavailable Testosterone	Prostate cancer	rs2668776	0.149363	0.037185	5.9e-05
Bioavailable Testosterone	Prostate cancer	rs2764772	0.153622	0.037193	3.62e-05
Bioavailable Testosterone	Prostate cancer	rs2961853	0.152827	0.036933	3.5e-05
Bioavailable Testosterone	Prostate cancer	rs328365	0.154207	0.036973	3.04e-05
Bioavailable Testosterone	Prostate cancer	rs34265755	0.154659	0.03695	2.84e-05
Bioavailable Testosterone	Prostate cancer	rs35251956	0.157409	0.036954	2.05e-05
Bioavailable Testosterone	Prostate cancer	rs3732218	0.153244	0.037081	3.59e-05
Bioavailable Testosterone	Prostate cancer	rs3752214	0.153946	0.036955	3.1e-05
Bioavailable Testosterone	Prostate cancer	rs4392940	0.144192	0.037133	0.000103
Bioavailable Testosterone	Prostate cancer	rs4872310	0.155179	0.036976	2.71e-05
Bioavailable Testosterone	Prostate cancer	rs56196860	0.16423	0.040376	4.75e-05
Bioavailable Testosterone	Prostate cancer	rs61932784	0.150798	0.036927	4.43e-05
Bioavailable Testosterone	Prostate cancer	rs6459544	0.151365	0.036939	4.17e-05
Bioavailable Testosterone	Prostate cancer	rs647737	0.155482	0.037026	2.68e-05
Bioavailable Testosterone	Prostate cancer	rs6486542	0.155979	0.037004	2.5e-05
Bioavailable Testosterone	Prostate cancer	rs6718154	0.157982	0.037237	2.21e-05
Bioavailable Testosterone	Prostate cancer	rs6766859	0.160822	0.037047	1.42e-05
Bioavailable Testosterone	Prostate cancer	rs714786	0.160052	0.037005	1.52e-05
Bioavailable Testosterone	Prostate cancer	rs71529289	0.157731	0.037175	2.21e-05
Bioavailable Testosterone	Prostate cancer	rs7207165	0.157515	0.037001	2.07e-05
Bioavailable Testosterone	Prostate cancer	rs7337958	0.153434	0.037058	3.47e-05
Bioavailable Testosterone	Prostate cancer	rs7338818	0.156308	0.036946	2.33e-05
Bioavailable Testosterone	Prostate cancer	rs7649178	0.154551	0.036986	2.93e-05
Bioavailable Testosterone	Prostate cancer	rs7679843	0.154471	0.037092	3.12e-05
Bioavailable Testosterone	Prostate cancer	rs7912521	0.169082	0.038286	1e-05
Bioavailable Testosterone	Prostate cancer	rs858518	0.158817	0.037214	1.98e-05
Bioavailable Testosterone	Prostate cancer	rs9376454	0.151691	0.037051	4.24e-05
Bioavailable Testosterone	Prostate cancer	rs950716	0.152923	0.037039	3.65e-05
Bioavailable Testosterone	Prostate cancer	rs9824196	0.152762	0.037017	3.68e-05
Bioavailable Testosterone	Prostate cancer	rs9986829	0.163566	0.037946	1.63e-05
Bioavailable Testosterone	Prostate cancer	All	0.155181	0.036824	2.51e-05
